# Supplementary material for: A Pan-Cancer Catalogue of Cancer Driver Protein Interaction Interfaces
Source: PLOS journal article supplement (doi:10.1371/journal.pcbi.1004518), 2015-10-20
Supplement: S1 (10.1371/journal.pcbi.1004518.s001) [file journal.pcbi.1004518.s001]

(listing pending)
